# Supplementary material for: Estimation of Serial Interval and Reproduction Number to Quantify the Transmissibility of SARS-CoV-2 Omicron Variant in South Korea
Source: MDPI journal article supplement (doi:10.3390/v14030533), 2022-03-04
Supplement: s1 [file s1]

**Table S1.** Estimation of serial interval distributions, evaluated by fitting four different parametric distributions.

|                    | <b>Normal</b> | <b>Log-normal</b> | <b>gamma</b> | <b>Weibull</b> |
|--------------------|---------------|-------------------|--------------|----------------|
| Mean (Days)        | 3.78          | 3.97              | 3.78         | 3.74           |
| Standard deviation | 3.33          | 12.98             | 6.65         | 1.00           |
| AIC <sup>†</sup>   | 386.7         | 412.88            | 396.11       | 389.78         |

<sup>†</sup>Akaike information criterion.
